# Supplementary material
Source: Springer Nature journal article supplement (https://www.springermedizin.de/resource/supplementary/12936_2006_211_MOESM4_ESM.pdf/9547186)

2001 2004

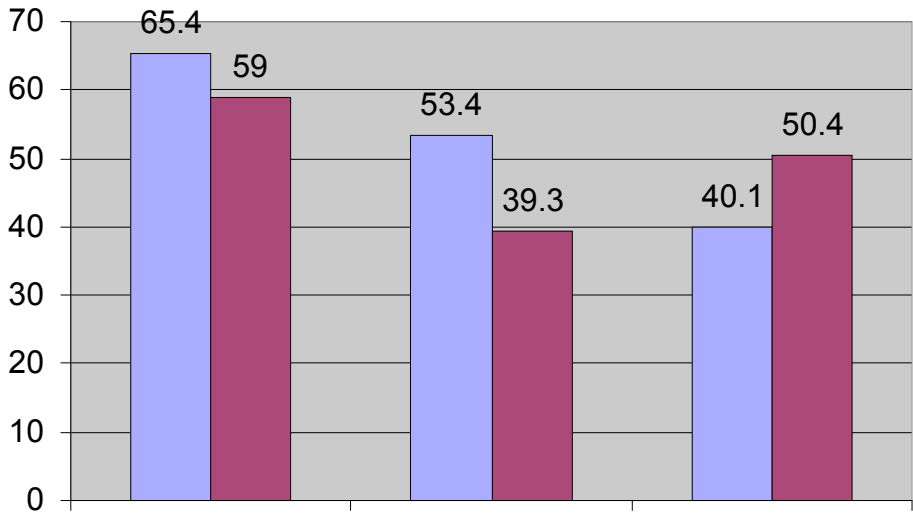

<5 slept under ITN > 5 slept under INT Preg mother slept under ITN

Supplement: MOESM4 [file 9547186]
